# Supplementary material for: Effectiveness of the EPA-based ‘Toolbox Family Medicine’ on students’ learning satisfaction: study protocol for a controlled trial
Source: bioRxiv or medRxiv preprint supplement (doi:10.1101/2022.01.18.22269060), 2022-01-21
Supplement: Supplementary file [file media-2.pdf]

**Translation of Ethics-Committee document (August 26, 2021)**

To:

Prof. Birgitta Weltermann  
Chair, Institute of Family Medicine and General Practice  
Venusberg-Campus 1  
53127 Bonn

From:

Prof. Kurt Racké  
Ethics Committee  
Medical Faculty, University of Bonn  
Venusberg-Campus 1  
53127 Bonn

Date: August 26, 2021  
KR/AS

**Evaluation of General Practice Rotation (Blockpraktikum)  
Your request via email from August 25, 2021**

Dear Mrs. Weltermann,

The above-mentioned documents were evaluated in the simplified process by the Chair of the Ethics' Committee of the Medical Faculty of Rheinische-Fredrich-Wilhelms-University Bonn:

It is confirmed that the described evaluation of the course "Blockpraktikum Allgemeinmedizin" (Family Medicine rotation) is not considered "biomedical research on humans" and thus this research project does not need counseling by the ethics committee in accordance with § 15 of the professional code for the physicians in North-Rhine.

Yours sincerely,

Prof. Dr. Kurt Racké  
Chair Ethics Committee

**Contact Information**

Prof. Birgitta Weltermann  
Institute of Family Medicine and General Practice  
Venusberg-Campus 1  
53127 Bonn, Germany

Prof. Dr. Birgitta Weltermann MPH(USA)  
Direktorin, Institut für Hausarztmedizin  
Haus 05, 1. OG Raum 270  
Venusberg-Campus 1/53127 Bonn  
Tel. 0228/287-11156, Fax -11160
